# Supplementary material
Source: PubMed Central journal article supplement (PMC8824777)
Supplement: NIHMS1775182-supplement-supplementary_material.pdf [file NIHMS1775182-supplement-supplementary_material.pdf]

**Table E1: Comparison of Included and Excluded Subjects**

|                                                        | Included subjects | Excluded subjects |
|--------------------------------------------------------|-------------------|-------------------|
| No. of participants                                    | 4166              | 829               |
| Demographics                                           |                   |                   |
| Age (y) mean $\pm$ SD                                  | 60 $\pm$ 9        | 57 $\pm$ 8        |
| Height (cm) mean $\pm$ SD                              | 170 $\pm$ 10      | 171 $\pm$ 9       |
| Weight (kg) mean $\pm$ SD                              | 84 $\pm$ 20       | 85 $\pm$ 20       |
| BMI (kg/m <sup>2</sup> ) mean $\pm$ SD                 | 29 $\pm$ 6        | 29 $\pm$ 6        |
| No. of men                                             | 2091 (50.2)       | 445 (53.7)        |
| Ethnicity                                              |                   |                   |
| No. of non-Hispanic white                              | 3011 (72.3)       | 486 (58.6)        |
| No. of African American                                | 1155 (27.7)       | 343 (41.4)        |
| Smoking status                                         |                   |                   |
| No. of current smokers                                 | 1778 (42.7)       | 661 (79.7)        |
| Smoking history (pack-year) mean $\pm$ SD              | 42 $\pm$ 24       | 42 $\pm$ 23       |
| Comorbidities                                          |                   |                   |
| No. of exacerbations in the prior year (mean $\pm$ SD) | 0.3 $\pm$ 0.8     | 0.3 $\pm$ 0.8     |
| No. of participants with Chronic Bronchitis            | 642 (15.4)        | 172 (20.8)        |
| Spirometry                                             |                   |                   |
| FEV1 (predicted%) mean $\pm$ SD                        | 81 $\pm$ 22       | 59 $\pm$ 23       |
| FEV1-to-FVC ratio (mean $\pm$ SD)                      | 0.7 $\pm$ 0.1     | 0.7 $\pm$ 0.2     |
| GOLD Stage                                             |                   |                   |
| No. of participants with PRISm                         | 495 (11.9)        | 91 (11.0)         |
| No. of participants with GOLD 0                        | 2016 (48.4)       | 379 (45.7)        |
| No. of participants with GOLD 1                        | 385 (9.2)         | 64 (7.7)          |
| No. of participants with GOLD 2                        | 798 (19.2)        | 155 (18.7)        |
| No. of participants with GOLD 3                        | 386 (9.3)         | 94 (11)           |
| No. of participants with GOLD 4                        | 86 (2.1)          | 21 (2.5)          |
| 6 minute walk (ft) mean $\pm$ SD                       | 1441 $\pm$ 364    | 1412 $\pm$ 369    |
| MMRC (mean $\pm$ SD)                                   | 1 $\pm$ 1         | 1 $\pm$ 1         |
| SGRQ (mean $\pm$ SD)                                   | 22 $\pm$ 21       | 25 $\pm$ 22       |
| Emphysema (%LAA-950 <sub>insp</sub> ) mean $\pm$ SD    | 5.3 $\pm$ 8.1     | 4.7 $\pm$ 7.7     |
| Gas Trapping (%LAA-856 <sub>exp</sub> ) mean $\pm$ SD  | 19.1 $\pm$ 17     | 18.9 $\pm$ 17.3   |

Note.—Data in parentheses are percentages. ADE = advanced destructive emphysema, FEV1 = force expiratory volume in 1 second, FVC = forced vital capacity, PRISm = preserved ratio impaired spirometry, GOLD = global initiative for chronic obstructive lung disease, MMRC = modified medical research council, SGRQ = St. George's respiratory questionnaire, %LAA-950<sub>insp</sub> = percentage of lung volume with attenuation less than-950HU at inspiration, %LAA-856<sub>exp</sub> = percentage of lung volume with attenuation less than-856HU at expiration.
